# Supplementary material for: Thermal solid state synthesis of coordination complexes from hydrogen bonded precursors
Source: Royal Society of Chemistry journal article supplement (doi:10.1039/b501555c), 2005-01-01
Supplement: b501555c.pdf [file b501555c.pdf]

## Experimental

### *Synthesis of [PhCH<sub>2</sub>PPh<sub>3</sub>]<sub>2</sub>[PdCl<sub>4</sub>]*

To a solution of potassium tetrachloropalladate (0.412g,  $1.262 \times 10^{-3}$  mol) in distilled water (50ml) was added benzyltriphenylphosphonium chloride (0.9837g,  $2.530 \times 10^{-3}$  mol). Dichloromethane (100ml) was added and the resulting mixture stirred overnight. The dichloromethane layer was separated and the water layer extracted with dichloromethane (3 x 50ml). The dichloromethane fractions were combined and dried over magnesium sulfate. The solvent was removed under reduced pressure leaving the product as a dark orange powder (0.982g,  $1.028 \times 10^{-3}$  mol, 81.5%).

### *Synthesis of [4-picolinium]<sub>2</sub>[PtCl<sub>4</sub>], 1*

To a solution of bis-benzyltriphenylphosphonium tetrachloroplatinate(II) (1.001g,  $9.60 \times 10^{-4}$  mol) in dichloromethane (50ml) was added, dropwise with stirring, a solution of 4-picolinium tetrafluoroborate (0.365g,  $2.02 \times 10^{-3}$  mol) in dichloromethane (20ml). Immediately upon addition a red/brown precipitate was observed which was isolated by filtration, washed with dichloromethane (2x20ml) and dried at the pump (0.411g,  $7.83 \times 10^{-4}$  mol, 81.6%). Microanalytical data (%). Found: C, 27.31; H, 2.97; N, 5.23. Calc.: C, 27.44; H, 3.07; N, 5.33.

### *Synthesis of [4-picolinium]<sub>2</sub>[PdCl<sub>4</sub>], 2.*

To a solution of bis-benzyltriphenylphosphonium tetrachloropalladate(II) (1.005g,  $1.05 \times 10^{-3}$  mol) in dichloromethane (50ml) was added, dropwise with stirring, a solution of 4-picolinium tetrafluoroborate (0.399g,  $2.21 \times 10^{-3}$  mol) in dichloromethane (20ml). Immediately upon addition a red brown precipitate was formed which was isolated by filtration, washed with dichloromethane (2x10ml) and dried at the pump (0.365g,  $8.37 \times 10^{-4}$  mol, 79.5%). Microanalytical data (%). Found: C, 32.07; H, 3.38; N, 6.05. Calc.: C, 33.02; H, 3.69; N, 6.42.

### *Thermolysis of 1.*

#### *A: Synthesis of [4-picolinium][(4-picoline)PtCl<sub>3</sub>], 3.*

Solid [4-picolinium]<sub>2</sub>[PtCl<sub>4</sub>] (0.411g,  $7.83 \times 10^{-4}$  mol) was heated, with stirring, under a flow of N<sub>2</sub> at 160°C for 90 minutes to give a pale orange/yellow powder (0.273g,  $5.60 \times 10^{-4}$  mol, 71.6%). Microanalytical data (%). Found: C, 29.62; H, 3.03; N, 5.37. Calc.: C, 29.49; H, 3.09; N, 5.73. Crystals suitable for X-ray diffraction study were grown by recrystallisation from dichloromethane/hexane.

#### *B: Synthesis of trans-[PtCl<sub>2</sub>(4-picoline)<sub>2</sub>], 4.*

Solid **3** (0.251g,  $5.15 \times 10^{-4}$  mol) was heated, with stirring under a flow of N<sub>2</sub> at 160°C for 40 minutes to give a yellow/orange powder (0.2297g,  $5.08 \times 10^{-4}$  mol, 98.6%). Microanalytical data (%). Found: C, 31.10; H, 3.24; N, 5.78. Calc.: C, 31.87; H, 3.12; N, 6.19. X-ray powder diffraction confirmed the structure of the product phase to be identical to that published for *trans*-[PtCl<sub>2</sub>(4-picoline)<sub>2</sub>] (C Tessier, F.D. Rochon. *Inorg. Chim. Acta*, 1999, **295**, 25).

*Thermolysis of 2.*

*Synthesis of trans-[PdCl<sub>2</sub>(4-picoline)<sub>2</sub>], 5.*

Solid [4-picolinium]<sub>2</sub>[PdCl<sub>4</sub>] (0.365g, 8.37x10<sup>-4</sup>mol) was heated with stirring under a flow of N<sub>2</sub> at 160°C for 90 minutes to give a pale orange/yellow powder (0.287g, 7.90x10<sup>-4</sup>mol, 94.4%). Crystals suitable for X-ray diffraction study were grown from dichloromethane/hexane. Microanalytical data (%). Found: C, 39.21; H, 3.72; N, 7.04. Calc.: C, 39.69; H, 3.88; N, 7.70.
